# Supplementary material for: Anti-Oxidant and Anti-Melanogenic Properties of Essential Oil from Peel of Pomelo cv. Guan Xi
Source: MDPI journal article supplement (doi:10.3390/molecules24020242), 2019-01-10
Supplement: s1 [file s1]

数据路径 : C:\msdchem\1\data\20181218\  
 数据文件 : HN-STA-1.D  
 采集 : 18 Dec 2018 9:36  
 操作者 :  
 样品 :  
 其他 :  
 ALS 样品瓶: 1 样品乘积因子: 1

检索库: C:\Database\NIST14.L 最小匹配度: 0

未知谱图: 顶点  
 积分事件: 化学工作站积分器 - events.e

| 峰# | R. T.  | 面积%  | 谱库/ID                              | 参比#    | CAS#         | 匹配度 |
|----|--------|------|------------------------------------|--------|--------------|-----|
| 1  | 4.118  | 2.62 | C:\Database\NIST14.L               |        |              |     |
|    |        |      | Nonane                             | 12938  | 000111-84-2  | 94  |
|    |        |      | Nonane                             | 12937  | 000111-84-2  | 87  |
|    |        |      | Nonane                             | 12939  | 000111-84-2  | 68  |
| 2  | 5.621  | 2.87 | C:\Database\NIST14.L               |        |              |     |
|    |        |      | Decane                             | 19649  | 000124-18-5  | 95  |
|    |        |      | Decane                             | 19650  | 000124-18-5  | 91  |
|    |        |      | Decane                             | 19648  | 000124-18-5  | 87  |
| 3  | 7.147  | 3.16 | C:\Database\NIST14.L               |        |              |     |
|    |        |      | Undecane                           | 29357  | 001120-21-4  | 96  |
|    |        |      | Undecane                           | 29356  | 001120-21-4  | 96  |
|    |        |      | Undecane                           | 29355  | 001120-21-4  | 91  |
| 4  | 8.623  | 3.38 | C:\Database\NIST14.L               |        |              |     |
|    |        |      | Dodecane                           | 39973  | 000112-40-3  | 97  |
|    |        |      | Dodecane                           | 39974  | 000112-40-3  | 96  |
|    |        |      | Dodecane                           | 39972  | 000112-40-3  | 96  |
| 5  | 10.022 | 3.58 | C:\Database\NIST14.L               |        |              |     |
|    |        |      | Tridecane                          | 51394  | 000629-50-5  | 98  |
|    |        |      | Tridecane                          | 51393  | 000629-50-5  | 97  |
|    |        |      | Tridecane                          | 51395  | 000629-50-5  | 97  |
| 6  | 11.345 | 3.72 | C:\Database\NIST14.L               |        |              |     |
|    |        |      | Tetradecane                        | 63625  | 000629-59-4  | 98  |
|    |        |      | Tetradecane                        | 63622  | 000629-59-4  | 98  |
|    |        |      | Tetradecane                        | 63623  | 000629-59-4  | 96  |
| 7  | 12.207 | 0.05 | C:\Database\NIST14.L               |        |              |     |
|    |        |      | 2,6-Dihydroxyacetophenone, 2TMS de | 155019 | 1000352-81-3 | 38  |
|    |        |      | rivative                           |        |              |     |
|    |        |      | 5-Methylsalicylic acid, 2TMS deriv | 155018 | 1000153-59-4 | 32  |
|    |        |      | ative                              |        |              |     |
|    |        |      | 1-Pentene, 1,3-diphenyl-1-(trimeth | 169273 | 138983-00-3  | 32  |
|    |        |      | ylsilyloxy)-                       |        |              |     |
| 8  | 12.597 | 3.45 | C:\Database\NIST14.L               |        |              |     |
|    |        |      | Pentadecane                        | 76609  | 000629-62-9  | 97  |
|    |        |      | Pentadecane                        | 76606  | 000629-62-9  | 95  |
|    |        |      | Pentadecane                        | 76608  | 000629-62-9  | 94  |
| 9  | 13.868 | 4.02 | C:\Database\NIST14.L               |        |              |     |

|    |        |      |                                                                      |        |             |    |
|----|--------|------|----------------------------------------------------------------------|--------|-------------|----|
|    |        |      | Hexadecane                                                           | 89842  | 000544-76-3 | 99 |
|    |        |      | Hexadecane                                                           | 89843  | 000544-76-3 | 95 |
|    |        |      | Hexadecane                                                           | 89840  | 000544-76-3 | 95 |
| 10 | 14.820 | 0.50 | C:\Database\NIST14.L                                                 |        |             |    |
|    |        |      | Malonic acid, bis(2-trimethylsilyl ethyl ester                       | 162858 | 090744-45-9 | 14 |
|    |        |      | 3-Isopropoxy-1,1,1,5,5,5-hexamethyl-3-(trimethylsiloxy)trisiloxane   | 208113 | 072182-11-7 | 12 |
|    |        |      | Boric acid, 3TMS derivative                                          | 138625 | 004325-85-3 | 10 |
| 11 | 15.547 | 4.07 | C:\Database\NIST14.L                                                 |        |             |    |
|    |        |      | Heptadecane                                                          | 102598 | 000629-78-7 | 98 |
|    |        |      | Heptadecane                                                          | 102599 | 000629-78-7 | 98 |
|    |        |      | Heptadecane                                                          | 102600 | 000629-78-7 | 97 |
| 12 | 17.744 | 4.14 | C:\Database\NIST14.L                                                 |        |             |    |
|    |        |      | Octadecane                                                           | 115547 | 000593-45-3 | 98 |
|    |        |      | Octadecane                                                           | 115544 | 000593-45-3 | 93 |
|    |        |      | Hexadecane                                                           | 89844  | 000544-76-3 | 91 |
| 13 | 18.464 | 0.19 | C:\Database\NIST14.L                                                 |        |             |    |
|    |        |      | Oxalic acid, 2TMS derivative                                         | 97005  | 018294-04-7 | 22 |
|    |        |      | 2-Pentenoic acid, 2-[(trimethylsilyl)oxy]-, trimethylsilyl ester     | 120478 | 055045-17-5 | 22 |
|    |        |      | Pentasiloxane, 1,1,3,3,5,5,7,7,9,9-decamethyl-                       | 209739 | 000995-83-5 | 16 |
| 14 | 20.525 | 4.24 | C:\Database\NIST14.L                                                 |        |             |    |
|    |        |      | Nonadecane                                                           | 128835 | 000629-92-5 | 98 |
|    |        |      | Nonadecane                                                           | 128834 | 000629-92-5 | 95 |
|    |        |      | Heptadecane                                                          | 102599 | 000629-78-7 | 91 |
| 15 | 23.888 | 4.62 | C:\Database\NIST14.L                                                 |        |             |    |
|    |        |      | Eicosane                                                             | 142238 | 000112-95-8 | 99 |
|    |        |      | Eicosane                                                             | 142239 | 000112-95-8 | 98 |
|    |        |      | Heptadecane                                                          | 102598 | 000629-78-7 | 96 |
| 16 | 27.843 | 4.25 | C:\Database\NIST14.L                                                 |        |             |    |
|    |        |      | Heneicosane                                                          | 155888 | 000629-94-7 | 98 |
|    |        |      | Heneicosane                                                          | 155886 | 000629-94-7 | 96 |
|    |        |      | Octadecane                                                           | 115546 | 000593-45-3 | 95 |
| 17 | 29.567 | 1.17 | C:\Database\NIST14.L                                                 |        |             |    |
|    |        |      | cis-Vaccenic acid                                                    | 142073 | 000506-17-2 | 99 |
|    |        |      | Oleic Acid                                                           | 142072 | 000112-80-1 | 99 |
|    |        |      | 9-Octadecenoic acid                                                  | 142074 | 002027-47-6 | 98 |
| 18 | 30.321 | 4.63 | C:\Database\NIST14.L                                                 |        |             |    |
|    |        |      | Docosane                                                             | 169409 | 000629-97-0 | 98 |
|    |        |      | Hexadecane, 2,6,10,14-tetramethyl-                                   | 142261 | 000638-36-8 | 98 |
|    |        |      | Docosane                                                             | 169408 | 000629-97-0 | 94 |
| 19 | 31.749 | 0.15 | C:\Database\NIST14.L                                                 |        |             |    |
|    |        |      | 3-Isopropoxy-1,1,1,5,5,5-hexamethyl-1-3-(trimethylsiloxy)trisiloxane | 208113 | 072182-11-7 | 30 |
|    |        |      | Benzyloxyamine, 2TMS derivative                                      | 127249 | 079208-41-6 | 20 |
|    |        |      | 3-Phenylpyrrolidine                                                  | 22873  | 062624-46-8 | 15 |
| 20 | 31.936 | 4.64 | C:\Database\NIST14.L                                                 |        |             |    |
|    |        |      | Tricosane                                                            | 182654 | 000638-67-5 | 98 |

Hexadecane, 2,6,10,14-tetramethyl- 142261 000638-36-8 98  
Octadecane 115547 000593-45-3 96

|    |        |      |                                                                                                                                                                                                       |                               |                                                 |                    |
|----|--------|------|-------------------------------------------------------------------------------------------------------------------------------------------------------------------------------------------------------|-------------------------------|-------------------------------------------------|--------------------|
| 21 | 33.196 | 4.61 | C:\Database\NIST14.L<br>Tetracosane<br>Tetracosane<br>Tetracosane                                                                                                                                     | 195673<br>195670<br>195672    | 000646-31-1<br>000646-31-1<br>000646-31-1       | 99<br>99<br>99     |
| 22 | 33.402 | 0.25 | C:\Database\NIST14.L<br>9-Octadecenamide, (Z)-<br>9-Octadecenamide, (Z)-<br>Cyclopropaneoctanal, 2-octyl-                                                                                             | 141028<br>141027<br>140252    | 000301-02-0<br>000301-02-0<br>056196-06-6       | 94<br>86<br>76     |
| 23 | 33.529 | 0.32 | C:\Database\NIST14.L<br>3-Isopropoxy-1,1,1,5,5,5-hexamethy<br>1-3-(trimethylsiloxy)trisiloxane<br>2-Amino-4-(4-nitrophenyl)thiazole<br>Hexahydropyridine, 1-methyl-4-[4-h<br>ydroxy-3-methoxyphenyl]- | 208113<br><br>84656<br>84391  | 072182-11-7<br><br>002104-09-8<br>094427-44-8   | 38<br><br>15<br>15 |
| 24 | 33.691 | 0.37 | C:\Database\NIST14.L<br>6-Octadecenoic acid<br>Oleic Acid<br>cis-11-Hexadecenal                                                                                                                       | 142075<br>142071<br>100562    | 1000336-66-8<br>000112-80-1<br>053939-28-9      | 91<br>55<br>50     |
| 25 | 34.110 | 0.14 | C:\Database\NIST14.L<br>Benzo[3,4]cyclobuta[1,2]cycloocten<br>e, 4b,5,6,7,8,9,10,10a-octahydro-<br>Indole, 3-methyl-<br>1H-Indole, 6-methyl-                                                          | 53117<br><br>14275<br>14293   | 056666-89-8<br><br>000083-34-1<br>003420-02-8   | 38<br><br>30<br>30 |
| 26 | 34.268 | 4.53 | C:\Database\NIST14.L<br>Octadecane<br>Heptadecane<br>Heptadecane, 3-methyl-                                                                                                                           | 115547<br>102599<br>115552    | 000593-45-3<br>000629-78-7<br>006418-44-6       | 96<br>95<br>95     |
| 27 | 35.063 | 0.15 | C:\Database\NIST14.L<br>Piperidine, 1-(5-trifluoromethyl-2<br>-pyridyl)-4-(1H-pyrrol-1-yl)-<br>Ambrox<br>Trimethylsilyl-di(trimethylsiloxy)-<br>silane                                                | 154311<br><br>98677<br>140353 | 1000268-74-7<br><br>100679-85-4<br>139347-50-5  | 25<br><br>25<br>25 |
| 28 | 35.411 | 4.65 | C:\Database\NIST14.L<br>Octadecane<br>Heptadecane<br>Octacosane                                                                                                                                       | 115547<br>102599<br>235614    | 000593-45-3<br>000629-78-7<br>000630-02-4       | 96<br>95<br>94     |
| 29 | 35.685 | 0.52 | C:\Database\NIST14.L<br>phenol, 2,6-dichloro-3-methyl-4-ni<br>tro-<br>1,3,4-Oxadiazole-2-acetic acid, 5-<br>(1,3-benzodioxol-5-yl)-<br>L-Rhamnose, (R,R,S,S)-, 4TMS deriv<br>ative                    | 84566<br><br>109130<br>256958 | 1000400-81-4<br><br>1000338-39-3<br>108392-01-4 | 68<br><br>22<br>22 |
| 30 | 36.210 | 0.20 | C:\Database\NIST14.L<br>3-Phenyl-4,5-dimethyl-2,1-oxaborol<br>ane<br>2(3H)-Thiazolethione, 4-methyl-<br>1H-Indole, 1-methyl-                                                                          | 66780<br><br>14107<br>14299   | 1000062-26-1<br><br>005685-06-3<br>000603-76-9  | 43<br><br>43<br>43 |

|    |        |      |                                                                                  |        |              |    |
|----|--------|------|----------------------------------------------------------------------------------|--------|--------------|----|
| 31 | 36.630 | 4.87 | C:\Database\NIST14.L                                                             |        |              |    |
|    |        |      | Octadecane                                                                       | 115547 | 000593-45-3  | 96 |
|    |        |      | Heptadecane                                                                      | 102599 | 000629-78-7  | 95 |
|    |        |      | Nonadecane, 9-methyl-                                                            | 142247 | 013287-24-6  | 95 |
| 32 | 36.757 | 0.32 | C:\Database\NIST14.L                                                             |        |              |    |
|    |        |      | 9H-carbazole, 3-ethenyl-9-ethyl-                                                 | 84521  | 1000400-80-8 | 35 |
|    |        |      | benzenamine, N-[bis(2,4,6-trimethylphenyl)boryl]-                                | 198391 | 1000398-20-2 | 30 |
|    |        |      | 4H-Pyrido[1,2-a]pyrimidine-3-carboxamide, 1,6,7,8-tetrahydro-1,6-dimethyl-4-oxo- | 84145  | 064399-29-7  | 25 |
| 33 | 37.019 | 0.09 | C:\Database\NIST14.L                                                             |        |              |    |
|    |        |      | 5-Hexenoic acid, 6-[p-chlorophenyl]-2,4-dioxo-, ethyl ester                      | 139543 | 076781-59-4  | 51 |
|    |        |      | Benzo[h]quinoline, 2,4-dimethyl-                                                 | 71668  | 000605-67-4  | 48 |
|    |        |      | 2-(n-Propyl)oxybenzylidene acetophenone                                          | 126759 | 1000395-75-6 | 42 |
| 34 | 37.503 | 6.25 | C:\Database\NIST14.L                                                             |        |              |    |
|    |        |      | Tetracosane                                                                      | 195673 | 000646-31-1  | 97 |
|    |        |      | Heptadecane                                                                      | 102599 | 000629-78-7  | 95 |
|    |        |      | Octadecane                                                                       | 115547 | 000593-45-3  | 95 |
| 35 | 37.642 | 0.37 | C:\Database\NIST14.L                                                             |        |              |    |
|    |        |      | Pyrrolidine, 1-(9-borabicyclo[3.3.1]non-9-yl)-                                   | 56917  | 022516-41-2  | 35 |
|    |        |      | 1,3,4-Oxadiazole-2-acetic acid, 5-(1,3-benzodioxol-5-yl)-                        | 109130 | 1000338-39-3 | 25 |
|    |        |      | 2-Fluoro-6-trifluoromethylbenzamide, N-pentyl-                                   | 136981 | 1000358-11-1 | 25 |
| 36 | 37.863 | 0.39 | C:\Database\NIST14.L                                                             |        |              |    |
|    |        |      | Phthalic acid, 2TMS derivative                                                   | 168551 | 002078-22-0  | 47 |
|    |        |      | 3-Phenylpyrrolidine                                                              | 22873  | 062624-46-8  | 15 |
|    |        |      | 2-Carboxycinnamic acid                                                           | 57260  | 000612-40-8  | 15 |
| 37 | 38.182 | 5.25 | C:\Database\NIST14.L                                                             |        |              |    |
|    |        |      | Nonadecane, 9-methyl-                                                            | 142250 | 013287-24-6  | 95 |
|    |        |      | Octacosane                                                                       | 235614 | 000630-02-4  | 95 |
|    |        |      | Dotriacontane, 1-iodo-                                                           | 272203 | 1000406-32-4 | 95 |
| 38 | 38.669 | 0.84 | C:\Database\NIST14.L                                                             |        |              |    |
|    |        |      | 2-Ethylacridine                                                                  | 71643  | 055751-83-2  | 47 |
|    |        |      | 2,4-Cyclohexadien-1-one, 3,5-bis(1,1-dimethylethyl)-4-hydroxy-                   | 85540  | 054965-43-4  | 47 |
|    |        |      | Benzo[h]quinoline, 2,4-dimethyl-                                                 | 71668  | 000605-67-4  | 38 |
| 39 | 38.759 | 4.84 | C:\Database\NIST14.L                                                             |        |              |    |
|    |        |      | Tricosane                                                                        | 182654 | 000638-67-5  | 97 |
|    |        |      | Tetracosane                                                                      | 195673 | 000646-31-1  | 97 |
|    |        |      | Heptadecane                                                                      | 102599 | 000629-78-7  | 96 |
| 40 | 38.931 | 0.29 | C:\Database\NIST14.L                                                             |        |              |    |
|    |        |      | 2-Ethylacridine                                                                  | 71643  | 055751-83-2  | 60 |
|    |        |      | Thymol, TBDMS derivative                                                         | 124822 | 330455-64-6  | 55 |
|    |        |      | acetic acid, 2-[bis(methylthio)methylene]-1-phenylhydrazide                      | 114619 | 1000401-44-4 | 46 |

|    |        |      |                                    |        |              |    |
|----|--------|------|------------------------------------|--------|--------------|----|
| 41 | 39.362 | 0.75 | C:\Database\NIST14.L               |        |              |    |
|    |        |      | Thymol, TBDMS derivative           | 124822 | 330455-64-6  | 46 |
|    |        |      | N-Methyl-1-adamantaneacetamide     | 71587  | 031897-93-5  | 38 |
|    |        |      | Benzo[h]quinoline, 2,4-dimethyl-   | 71668  | 000605-67-4  | 38 |
| 42 | 39.475 | 0.36 | C:\Database\NIST14.L               |        |              |    |
|    |        |      | 4-Dehydroxy-N-(4,5-methylenedioxy- | 157264 | 1000111-66-9 | 43 |
|    |        |      | 2-nitrobenzylidene)tyramine        |        |              |    |
|    |        |      | 2-(n-Propyl)oxybenzylidene acetoph | 126759 | 1000395-75-6 | 38 |
|    |        |      | enone                              |        |              |    |
|    |        |      | 2-(Acetoxymethyl)-3-(methoxycarbon | 141906 | 093103-70-9  | 38 |
|    |        |      | yl)biphenylene                     |        |              |    |
| 43 | 39.625 | 0.16 | C:\Database\NIST14.L               |        |              |    |
|    |        |      | 2-Ethylacridine                    | 71643  | 055751-83-2  | 59 |
|    |        |      | 1,2-Benzisothiazol-3-amine, TBDMS  | 124363 | 1000332-57-2 | 50 |
|    |        |      | derivative                         |        |              |    |
|    |        |      | 1-(4-Chlorophenoxy)-1-(1H-imidazol | 151396 | 1000408-59-9 | 47 |
|    |        |      | -1-yl)-3,3-dimethylbutan-2-one     |        |              |    |
